1 **Success of *Escherichia coli* O25b:H4 ST131 clade C associated with a**  
2 **decrease in virulence**

3 Marion DUPRILOT<sup>a,b#</sup>, Alexandra BARON<sup>a</sup>, François BLANQUART<sup>a,c</sup>, Sara DION<sup>a</sup>,  
4 Philippe LETTÉRON<sup>d</sup>, Saskia-Camille Flament-Simon<sup>e</sup>, Olivier CLERMONT<sup>a</sup>, Erick  
5 DENAMUR<sup>a,f</sup>, Marie-Hélène NICOLAS-CHANOINE<sup>a#</sup>

6

7 <sup>a</sup>: Université de Paris, INSERM, IAME, 75018 Paris

8 <sup>b</sup>: APHP, Laboratoire de Microbiologie, Hôpital Beaujon, 92110 Clichy

9 <sup>c</sup>: Centre for Interdisciplinary Research in Biology (CIRB), Collège de France, CNRS,  
10 INSERM, PSL Research University, Paris, France

11 <sup>d</sup>: Université Paris Diderot UMR 1149 Inserm - ERL CNRS 8252 75018 Paris

12 <sup>e</sup>: Laboratorio de Referencia de *Escherichia coli* (LREC), Departamento de Microbiología e  
13 Parasitología, Facultade de Veterinaria, Universidade de Santiago de Compostela (USC),  
14 Lugo, Spain.

15 <sup>f</sup>: APHP, Laboratoire de Génétique Moléculaire, Hôpital Bichât, 75018 Paris

16

17 #Address correspondence to:

18 Marion DUPRILOT, e-mail: [marion.duprilot@gmail.com](mailto:marion.duprilot@gmail.com)

19 Marie-Hélène NICOLAS-CHANOINE, e-mail: [marie-helene.nicolas-chanoine@inserm.fr](mailto:marie-helene.nicolas-chanoine@inserm.fr)

20

21 Running Head: Loss of virulence in the global emergent ST131 clade C

22 Abstract word count: 248

23 Text word count: 5256

24

25

## 26 **Abstract**

27 *Escherichia coli* of sequence type (ST) 131 resistant to fluoroquinolones and producer of  
28 CTX-M-15 is globally one of the major extraintestinal pathogenic *E. coli* (ExPEC). ST131  
29 phylogenesis showed that multidrug-resistant ST131 strains belong to a clade called C,  
30 descending from an ancestral clade called B, comprising mostly antibiotic-susceptible strains.  
31 Antibiotic resistance could appear as one of the keys of the clade C global success. We  
32 hypothesized that other features of ST131 clade C could contribute to this success since other  
33 major global ExPEC clones (ST73, ST95) are mostly antibiotic-susceptible. To test this  
34 hypothesis, we measured the growth abilities, early biofilm formation and virulence-factor  
35 content of a collection of clade B and clade C strains. Moreover, using competition assays, we  
36 measured the capacity of selected representative strains of clades B and C to colonize the  
37 mouse intestine and urinary tract, and to kill mice in a septicemia model. Clade B and C  
38 strains had similar growth ability. However, clade B strains were more frequently early  
39 biofilm producers, expressed mostly faster their type 1 fimbriae and displayed more virulence  
40 factor-encoding genes than clade C strains. Clade B outcompeted clade C in the gut and/or  
41 urinary tract colonization models and in the septicemia model. These results strongly suggest  
42 that clade C strain evolution includes a loss of virulence, *i.e.* a process that could enhance  
43 micro-organism persistence in a given host and thus optimize transmission. This process,  
44 associated with acquired antibiotic-resistance, could ensure clade C strain survival in  
45 environments under antibiotic pressure.

46

47

48

49

50

## 51 **Importance**

52 Extraintestinal pathogen *Escherichia coli* (ExPEC) are virulent but mostly antibiotic-  
53 susceptible. One worrying exception is ST131, a major multidrug resistant ExPEC clone that  
54 has spread worldwide since the 2000s. To contain the emergence of this threatening clone, we  
55 need to understand what factors favored its emergence and dissemination. Here, we  
56 investigated whether multidrug-resistant ST131 had advantageous phenotypic properties  
57 beyond multidrug resistance. To this end, we competed the emergent multidrug-resistant  
58 ST131 with its antibiotic-susceptible ancestor in different conditions: biofilm production, *in*  
59 *vivo* colonization and virulence experiments. In all *in vivo* competitions, we found that  
60 multidrug-resistant ST131 was losing to its ancestor, suggesting a lesser virulence of  
61 multidrug-resistant ST131. It was previously described that losing virulence can increase  
62 micro-organism persistence in some populations and subsequently its level of transmissibility.  
63 Thus, a decreased level of virulence, associated with multidrug resistance, could explain the  
64 global success of ST131.

65

66

67

68

69

70

71

72

73

74

## 75 **Introduction**

76 In the last two decades, *Escherichia coli* O25b:H4 of sequence type (ST) 131 has emerged  
77 worldwide among human extraintestinal pathogenic *E. coli* (ExPEC) (1, 2). This multidrug  
78 resistant clone has become a major public health issue. The evolutionary history of this  
79 successful ST has been reconstructed in details. Within O25b:H4 ST131, two clades called B  
80 and C were distinguished on the basis of their *fimH* gene allele, *H22* and *H30*, respectively (3,  
81 4). Through a time-calibrated phylogeny, Ben Zakour *et al.* showed that clade B is the  
82 ancestor of clade C and that sequential mutational events have shaped the evolution of ST131  
83 from the 1950s (5). This evolutionary scenario shows the diversification of clade B into  
84 different subclades (from B1 to B5, then the intermediate B0) and notably clade C. Clade C  
85 also diversified into different subclades characterized by the acquisition of the *fimH30* allele  
86 around 1980 (subclade C0), followed by the acquisition of the *gyrA-1AB* and *parC-1aAB*  
87 alleles encoding fluoroquinolone resistance that occurred around 1987 (subclades C1 and C2).  
88 All subclade C2 strains and some of subclade C1 forming C1-M27 cluster (6) are additionally  
89 resistant to extended spectrum cephalosporins (ESC) due to the production of extended  
90 spectrum  $\beta$ -lactamases (ESBL) of CTX-M type, CTX-M-15 and CTX-M-27, respectively.  
91 Epidemiologic studies mostly determined ST131 prevalence among *E. coli* isolates resistant  
92 to fluoroquinolones and/or producers of ESBL (7). Studies designed to assess the relative  
93 frequencies of clade B and clade C ST131 strains are rare (8–10) and those to assess the  
94 relative frequencies of B and C subclades strains do not exist. Recently, Kallonen *et al.*  
95 depicted 14.4% of ST131 clades among bacteremia *E. coli* isolates systematically collected  
96 between 2001 and 2012 in England (9). Using the English ST131 isolates' whole genome  
97 sequences, we were able to assess the relative frequencies of subclades B and C in the present  
98 study.

99 The evolutionary success of ST131 is still largely unexplained. Resistance to antibiotics,  
100 notably to fluoroquinolones and ESC may explain the success of clade C strains, as these  
101 resistances were shown not to impact the clade C growth fitness (11, 12). However, clones  
102 susceptible to antibiotics, such as ST73 and ST95, are as successful as ST131 clade C among  
103 bacteremia, suggesting that factors other than antibiotic resistance can participate in the  
104 success of a clone (9),

105 The aim of our study was thus to investigate the potential role of factors other than antibiotic  
106 resistance, notably growth rate, biofilm formation, colonization ability and virulence, in the  
107 success of ST131 clade C strains. To this purpose, we first established a collection of 39 *E.*  
108 *coli* O25b:H4 ST131 comprising representatives of the ST131 clade and subclade genetic  
109 diversity and tested them in a variety of *in vitro* phenotypic tests. We then selected three  
110 strains for further *in vitro* and *in vivo* competition assays, including various mouse models.

111

## 112 **Materials and methods**

113 Technical details for each section are available in the supplemental material Text S1.

### 114 **Bacterial strains**

115 The 39 studied O25b:H4 ST131 *E. coli* strains comprised 18 *fimH22* and 21 *fimH30* strains  
116 obtained between 1993 and 2012 from different geographic origins and sources (Table S1).

117 Nalidixic acid and ciprofloxacin resistance had been determined by the agar diffusion method  
118 and interpreted following the 2015 EUCAST recommendations ([www.eucast.org](http://www.eucast.org)) and ESBL  
119 production by the double disk synergy test (13). CFT073 and *E. coli* K-12 MG1655 strains  
120 were used as positive and negative controls, respectively, in the septicemia mouse model.

### 121 **Genome sequencing and analysis**

122 Whole genome sequencing (WGS) of our 39 strains was performed (Tables S2). All genomes  
123 were analyzed for plasmid content and typing [Plasmid Finder, with identity >95%, and

124 pMLST (14)]. Then, Abricate (15) was used to detect genes encoding antibiotic resistance  
125 with Resfinder (16) and virulence factors with a custom virulence database composed of  
126 VirulenceFinder (17), the virulence factor database (VFDB) (18), and classical genes  
127 characterizing ExPEC. Virotypes were determined as previously described (19). All contigs  
128 were submitted to the MicroScope Platform (20) for further gene investigation such as  
129 *gyrA/parC* alleles and genes involved in the biofilm formation (21). When necessary,  
130 presence or absence of some genes was controlled by PCR.  
131 We investigated how the different subclades B and C of ST131 were represented in our  
132 collection and how they evolved in frequency over time in a larger collection from Kallonen  
133 *et al.* (9). To that end, we complemented our 39 genomes with 218+21 genomes from two  
134 published studies [218 from Kallonen *et al.* (9), 21 from Ben Zakour *et al.* (5)]. The  
135 phylogenetic tree including all the strains was constructed from non-recombinant single  
136 nucleotide polymorphisms (SNPs) of core genomes using maximum likelihood. To infer the  
137 linear trend of Kallonen *et al.*'s isolates over 2001-2012, we fitted a logistic model to the  
138 frequency of each subclade as a function of time (in years).

### 139 **Gene deletion and gene complementation**

140 Replacement by a kanamycin resistance cassette was used to inactivate the chromosomal *fimB*  
141 gene of S250 and CES131C strains and the plasmidic *aadA2* gene of CES131C strain  
142 following a strategy adapted from Datsenko and Wanner (22). Primers and plasmids used are  
143 listed in Tables S3 and S4. Complementation of  $\Delta$ *fimB* mutants were performed by cloning  
144 the promoter and encoding regions of the parental *fimB* genes into pSC-A-amp/kan (Table S4)  
145 by using the StrataClone PCR Cloning Kit (Agilent Technologies, Massy, France). The  
146 recombinant plasmid was then electroporated into competent strains S250 $\Delta$ *fimB*:: or  
147 CES131C $\Delta$ *fimB*:: and transformants were selected on lysogeny broth (LB) (Invitrogen,  
148 Carlsbad, California, USA) agar plates containing 100 mg/L of kanamycin. The empty

149 plasmid pSC-A-amp/kan-Control\_Insert was used as negative control. All mutants were  
150 confirmed by PCR and sequencing.

### 151 **Determination of early biofilm formation**

152 The primary step (5 h incubation) of biofilm formation was measured using BioFilm Ring  
153 Test<sup>®</sup> (BioFilm Control, Saint-Beauzire, France) according to the manufacturer's  
154 recommendations and as previously described (23). The biofilm formation index (BFI), with  
155 values ranging from 20 (absence of biofilm formation) to 0 (high biofilm formation), is  
156 inversely proportional to the biofilm formation ability. A BFI value of 10 was chosen as the  
157 biofilm production cut-off (biofilm formation:  $BFI \leq 10$ , no biofilm formation:  $BFI > 10$ ). The  
158 experiments were repeated at least three times for each strain. BHI broth without any strains  
159 was used as negative control, and strains S250 and 39, previously described with this method  
160 as strong and never biofilm producers, respectively, as control strains (24).

### 161 **Yeast cell agglutination assay**

162 Expression of type 1 fimbriae was assessed by using the yeast cell (*Saccharomyces*  
163 *cerevisiae*) agglutination assay as previously described (25), and after adaptations to highlight  
164 the early expression of type 1 fimbriae, by using 10  $\mu$ L of a pellet obtained after  
165 centrifugation (3000 g, 10 min) of 3 mL of LB broth culture after 2 and 5 h-incubations for  
166 the agglutination assay. Based on the biofilm formation and the sequence of the *fim* operon,  
167 strains S250 and H1447 were used as positive and negative controls, respectively.

### 168 **Congo red assays**

169 Curli and cellulose production was assessed by using stationary-phase cultures spotted onto  
170 LB low salt (Invitrogen) plates supplemented with 40  $\mu$ g/mL Congo red (Sigma Aldrich, St-  
171 Quentin Fallavier, France) at 30°C during 48 h, as previously described (26). The production  
172 of curli fimbriae and cellulose resulted in the red, dry and rough (rdar) colony morphotype.

### 173 **Colicin and/or phage production**

174 Colicin and/or phage production was detected by plaque lysis assays, with *E. coli* K-12 used  
175 as the sensitive strain as previously described (27). The assay was considered as positive  
176 when tested strains were surrounded by a halo, corresponding to the growth inhibition of *E.*  
177 *coli* K-12 strain.

## 178 **Fitness assays**

### 179 Individual fitness assays

180 Fitness assay was performed as previously described in LB broth (28) by using an automatic  
181 spectrophotometer (Tecan Infinite F200 Pro) that measures the OD<sub>600</sub> in each well every 5  
182 min over a period of 24 h. The experiment was repeated three times. Growth curves were then  
183 analyzed and maximum growth rates was calculated and expressed in h<sup>-1</sup>.

### 184 Competition experiments

185 Selected strains of our collection and constructed mutants were submitted in pairs to  
186 competition in different conditions.

### 187 In vitro planktonic competitions

188 To determine the relative fitness of strains in planktonic conditions, they were grown in  
189 couple in LB broth during 100 generations, *i.e.* during ten days, as previously described (29).

190 Competitive indexes (CI) were obtained using the following formula:

191  $\log\text{CFU}[(\text{isolate1}/\text{isolate2})_{T_x}/(\text{isolate1}/\text{isolate2})_{T_0}]$ , isolate1 being the first strain cited and  
192 isolate2 the second one in figure legends.

### 193 In vitro competitions in biofilm conditions

194 To determine the relative fitness of strains in biofilm conditions, they were grown at 1:1 ratio  
195 in mixed colonies during seven days in aerobic and anaerobic conditions, with adaptations to  
196 what's previously described (30). For each competition, the experience was repeated three  
197 times. CIs were obtained as described above.

### 198 Intestinal colonization mouse model



199 Six-week-old female mice CD-1 from Charles River® (L'Arbresle, France) pre-treated with  
200 streptomycin before inoculation of challenging strains were used to assess strains' relative  
201 ability to colonize the mouse intestine, as previously described (28). At least five mice were  
202 used for each competition. At days 1, 4 and 7, the intestinal population of *E. coli* was  
203 estimated by plating dilutions of weighed fresh feces on LB agar and LB agar with  
204 appropriate antibiotics (kanamycin 50 mg/L or ciprofloxacin 1 mg/L). CIs were obtained as  
205 described above.

#### 206 Septicemia mouse model

207 Female mice OF1 of 14-16 g (4-week-old) from Charles River® were used to assess the  
208 strains' relative ability to cause sepsis, as previously described (31). After subcutaneous  
209 inoculation of individual strain or mixed strains at a 1:1 ratio, time to death was monitored  
210 during seven days. Five to ten mice were used for each assay. In all experiments, CFT073  
211 strain and *E. coli* K-12 MG1655 strain were used as positive and negative control,  
212 respectively (32). Kaplan-Meier estimates of mouse survival were performed for individual  
213 strain inoculations. In competitions assays, the spleen of all spontaneously dead mice was  
214 collected, weighed and pounded in physiological water and infecting population of *E. coli* was  
215 estimated by plating dilutions of spleen suspensions on LB agar and LB agar with appropriate  
216 antibiotics (kanamycin 50 mg/L, ciprofloxacin 1 mg/L or ampicillin 100 mg/L). CIs were  
217 obtained as described above.

#### 218 Urinary tract infection mouse model

219 CBA female mice of 8-22g (8-week-old) from Janvier® (Le Genest-Saint-Isle, France) were used  
220 to assess strains' relative ability to cause an ascending unobstructed urinary tract infection, as  
221 previously developed in our lab (33). Ten mice were used for each competition assay, and the  
222 experiments were repeated twice. CIs were obtained as described above.

223

## 224 **Statistical analysis**

225 Wilcoxon rank sum test was used to compare the average number of virulence factor (VF) per  
226 clade and Fisher's exact test was used to test the distribution of each VF-encoding gene  
227 between clades. Individual fitness measurement was estimated by a mixed model with random  
228 effect on the strain to take into account the triplicate determination. For biofilm data, two-way  
229 repeated measures ANOVA was performed, followed by Tukey's range test when necessary  
230 (if there were three groups). The association between groups (virotypes, biofilm phenotypes,  
231 yeast agglutination test and Congo red assay) was assessed by Fisher's exact test. For the *in*  
232 *vitro* and *in vivo* competitions, a non-parametric Wilcoxon test on paired data was conducted  
233 on CI values, and P values were corrected for multiple comparisons by the Benjamini-  
234 Hochberg procedure (34) when necessary. Mouse survival differences were determined by  
235 Log-Rank test. A significance level of 0.05 was used for all tests. All statistical analyses were  
236 carried out with R software (35).

237 To visualize all data of our strain collection in one graph, a multiple correspondence analysis  
238 (MCA) was realized with R software (35). The variables included in the analysis were strain  
239 source, *fimH* allele, fluoroquinolone susceptibility, ESBL production, and biofilm formation  
240 phenotype. The distance between the variables and the origin of the graph measures the  
241 quality of their representation and is estimated by the square cosine ( $\cos^2$ ): variables far from  
242 the origin of the graph are discriminant and got a high  $\cos^2$  and variables close to the origin  
243 are not perfectly depicted and got a low  $\cos^2$  (Figure S1A).

## 244 **Ethics statement**

245 Colonization, septicemia and pyelonephritis murine protocols (n°APAFIS#4948-  
246 2016021216251548 v4, n°APAFIS#4951-2016020515004032 v2 and n°APAFIS#4950-  
247 2016021211417682 v4, respectively) were approved by the French Ministry of Research and  
248 by the ethical committee for animal experiments.

249 **Data availability**

250 Raw sequences of the 39 isolates were deposited in GenBank under BioProject accession  
251 number [PRJNA320043](#) and [PRJNA566165](#).

252

253 **Results**

254 **Evolutionary success of the C1 and C2 subclade strains in extraintestinal infections**

255 Using both the genome sequences of the ST131 strains published by Kallonen *et al.* (9) and  
256 the genome sequences of strains belonging to the different B and C subclades (5), we  
257 characterized the B and C subclades of Kallonen *et al.*'s O25b:H4 ST131 strains (Figure S2).  
258 By investigating trends in O25b:H4 ST131 subclade frequency over the period 2001-2012  
259 (Figures 1A, 1B, 1C) in extraintestinal infections, we observed that (i) B4 and B5 subclade  
260 strains increased more than the other B subclade strains, (ii) clade C strains increased more  
261 than clade B strains and (iii) C2 subclade strains displayed the most important increase. Thus,  
262 although both clades B and C were maintained over this time period, clade C appears more  
263 evolutionarily successful than clade B.

264 **Establishment of a collection of representative strains of the ST131 O25b clades and**  
265 **subclades**

266 Clades and subclades

267 To determine which previously established ST131 clades and subclades our 39 strains  
268 belonged to, a phylogenetic tree was inferred using core genomes exempt of recombinant  
269 regions (Figure S2). Our collection comprised strains belonging to each subclade B (except  
270 for B2 and B0) and each subclade C. Among the 19 clade B strains, 17 displayed the expected  
271 *fimH22*, one a *fimH22*-like variant, and one, CES131C strain belonging to subclade B4, the

272 *fimH30* variant that had been described as specific of clade C strains. For these reasons,  
273 CES131C strain was called “Hybrid” in the rest of the study.

#### 274 Plasmids

275 All strains but one (strain 208) harbored an IncF plasmid with a FII, FIA and FIB replicon  
276 allele composition corresponding to the one previously described for clade B and C1 and C2  
277 subclades strains (12), except that one C1 subclade strain (CES9C) lacked the FIB replicon as  
278 described in C2 subclade strains (Table S5).

#### 279 Genes encoding antibiotic resistance

280 As shown in Table S5, our collection comprised strains that displayed a diverse antibiotic  
281 resistance-encoding gene content in both clades B and C, with a gradual accumulation of  
282 these genes from clade B to clade C.

#### 283 VF-encoding genes

284 Among the genes classically sought for in ExPEC (19), those found in our strains are  
285 presented according to subclades in Table S6. The average number of VF-encoding genes was  
286 higher in clade B strains ( $17 \pm 2.1$ ) than in clade C strains ( $14.3 \pm 1.3$ ) ( $P < 0.0001$ ). The *hlyF*,  
287 *cdtB*, *iroN*, *kpsMII*, *cvaC*, *iss* and *ibeA* genes were significantly more frequent among clade B  
288 strains than among clade C strains whereas the opposite was found for the *sat* gene. Virotypes  
289 (19) were significantly associated with subclades ( $P < 0.00001$ ) and virotypes not yet described  
290 were displayed by Hybrid, one C1 subclade and three C2 subclade strains.

#### 291 **Individual strain phenotypic assays *in vitro***

##### 292 Maximum growth rate (MGR)

293 We assessed the fitness of our 39 strains by measuring MGR in planktonic conditions (Figure  
294 3). MGR did not differ significantly between clade B and clade C strains ( $P = 0.08$ ), and  
295 between clinical and feces isolates ( $P = 0.07$ ) (Figures 3A and 3B). Within clade B strains,  
296 those resistant to nalidixic acid seemed to have a lower MGR than the susceptible ones

297 (Figure 3C), but this difference was not significant ( $P=0.2$ ). Regarding clade C strains, no  
298 significant MGR differences were observed between nalidixic acid/ciprofloxacin-resistant  
299 strains and susceptible strains ( $P=0.9$ ) (Figure 3D).

### 300 Kinetic of early biofilm formation and expression of type 1 and curli fimbriae

301 Clade B strains were more frequently biofilm producers than clade C strains at 2 and 5 h  
302 ( $P<0.001$ ). We found three significantly different phenotypes of early biofilm production  
303 ( $P<0.0001$ ) within our 39 strains (Figure 2, Table S5): early and persistent producers ( $BFI\leq 10$   
304 at 2, 3 and 5 h), delayed producers ( $BFI>10$  at 2 and 3 h but  $\leq 10$  at 5 h) and never producers  
305 ( $BFI>10$  at 2, 3 and 5 h). As BFI values after 2 and 3 h of incubation classified a given strain  
306 into the same biofilm production phenotype (Figure 2A), only BFI values obtained after 2 and  
307 5 h of incubation were considered for further analyses. The 20 clade C strains were either  
308 delayed producers ( $n=8$ ) or never producers ( $n=12$ ). There was no significant association  
309 between subclades C and biofilm phenotype. Clade B strains produced biofilm more  
310 frequently than clade C strains. Five (71%) of the B5 strains were early producers and two  
311 (29%) were delayed producers, whereas all eight B4 strains were delayed or never producers.  
312 This difference between B5 and B4 strains was statistically significant ( $P=0.02$ ).

313 As the ability to form early biofilm is linked to type 1 fimbriae and curli fimbriae expression  
314 (36), we studied these expressions in our strains by using the yeast agglutination test and  
315 analyzing colony aspect of bacteria spotted on Congo red agar, respectively. After 2 and 5 h  
316 of shaking growth, we observed that the early biofilm producers ( $n=8$ ) expressed their type 1  
317 fimbriae more quickly than the delayed and never producers ( $P\leq 0.0001$ ) (Table 1). Applying  
318 the standard yeast agglutination test as Totsika *et al.* (25) in which fimbriae expression is  
319 assessed after  $\geq 24$  h, no significant differences were observed for type 1 fimbriae expression  
320 according to biofilm phenotypes or clade membership, in both shaking and static conditions  
321 (Table 1). Production of curli fimbriae and cellulose was explored (Table 2). There was a

322 significant association between Congo red morphotype and early biofilm formation capacity  
323 ( $P < 0.0001$ ). Significantly more clade B (47%) than clade C strains (15%) were positive for  
324 the Congo red assay ( $P < 0.05$ ).

#### 325 Genes potentially linked to different phenotypes of early biofilm formation

326 To investigate the genetic factors potentially involved in differences in biofilm formation, we  
327 examined the diversity in the *fim* operon across all strains, knowing that Fim proteins  
328 participate in biofilm formation (21) and that an insertion sequence ISEc55 has been  
329 described in the clade C strain *fimB* gene (25) that encodes a co-factor of the type 1 fimbriae  
330 synthesis regulation. We found at least one non-synonymous SNP per gene in the *fim* operon  
331 between clade B and clade C strains (Figure S3). The entire *fim* operon was the same in all  
332 clade C strains, including ISEc55 within the *fimB* gene. Within clade B, two strains (H1447  
333 and 001-001) found as delayed biofilm producers possessed a partially deleted *fim* operon.  
334 Hybrid, which was also a delayed biofilm producer, displayed a *fim* operon completely  
335 different from that of the other clade B strains, showing a perfect match with the *fim* operon  
336 of clade C strains, except for two SNPs and the absence of ISEc55 within its *fimB* gene  
337 (Figure S3). In order to assess the role of the *fimB* gene inactivation in clade C, we  
338 constructed  $\Delta$ *fimB* variants from an early biofilm producer B1 strain (S250 strain), and a  
339 delayed biofilm producer (Hybrid). Both  $\Delta$ *fimB* variants lost their ability to form biofilm  
340 during the 5h-time period (Figures 2B and 2C). Complementation with the wild *fimB* gene  
341 restored the biofilm production phenotype displayed by the parental strain of the two variants  
342 (Figures 2B and 2C).  $\Delta$ *fimB* variants were also submitted to yeast agglutination test and  
343 Congo red assay. Both  $\Delta$ *fimB* variants were negative for early yeast agglutination test, unlike  
344 parent strains, but were positive for standard test. No changes were observed on Congo red  
345 phenotype for both variants (data not shown).

346 Further genes and/or deduced proteins previously described as involved in *E. coli* biofilm  
347 formation (21) were compared between our strains by taking S250 strain as reference (data  
348 not shown). We observed identical protein sequence modifications in all B4 strains that were  
349 all delayed biofilm producers: substitution K142Q in FlgD that is required for flagellar hook  
350 assembly (37), the presence of the *nanC* gene (absent in the other clade B strains) and  
351 encoding N-acetylneuraminic acid porin of which regulators also control the *fimB* expression  
352 (38), and a 7-bp deletion at the end of the *ydaM* gene encoding a diguanylate cyclase playing  
353 a role in the curli biosynthesis by inducing the transcription of the regulator CsgD.

#### 354 **Strain selection for competition assays**

355 In order to compare more accurately the fitness of clade B and C strains, we turned to  
356 competitions assays. To select candidates for competitions among our 39 strains, we used the  
357 phylogenetic history (Figure S2), the multiple correspondence analysis (Figure S1B), acquired  
358 antibiotic resistance (Table S5) and MGR values. Among clade B strains, we selected strain  
359 S250 *i.e.* one of the two most ancestral strains (subclade B1) that we called “Ancestor”.  
360 Among clade C strains, we selected a C1 subclade strain, CES164C, harboring the clade C-  
361 characteristic fluoroquinolone resistance and a limited plasmid-mediated resistance  
362 (amoxicillin resistance related to TEM enzyme), to avoid the potential burden of additional  
363 resistances, such as that related to the production of CTX-M-15 in each C2 subclade strain.  
364 Accordingly, we called CES164C strain “Emergent”. We also retained Hybrid (subclade B4)  
365 that harbors the first trait having characterized the emergence of clade C strains *i.e.* the  
366 *fimH30* allele.

367 As shown in Table 3, Ancestor, Emergent and Hybrid displayed a similar average MGR in LB  
368 (Wilcoxon Rank Test,  $P > 0.1$ ), were non-colicin/phage producers, but displayed differences in  
369 early biofilm formation, type 1 fimbriae expression and Congo red phenotype, as well as in  
370 the number and content of genes encoding antibiotic resistance and VFs (Table 3 and Figure

371 4). However, some VF-encoding genes were present only in Ancestor: the invasin-encoding  
372 *ibeA* gene, the salmochelin-encoding *iroBCDEN* cluster, and the *etsC* gene encoding a  
373 putative secretion system I, whereas some others were only present in Hybrid: the *afaACDE*  
374 and *draP* encoding Afa/Dr adhesins, the *daaF* gene encoding the F1845 fimbrial adhesin, the  
375 *celB* gene encoding a major carbohydrate active-transport system and the *mcbA* gene  
376 encoding a bacteriocin.

377 To assess the potential role of the *fimB* gene in the fitness of our strains, we also retained  
378  $\Delta$ *fimB*::Kana variants of Ancestor and Hybrid, the absence of kanamycin cassette fitness cost  
379 having been checked *in vivo* by competing Ancestor $\Delta$ *fimB*::Kana against Ancestor $\Delta$ *fimB*::  
380 and Hybrid $\Delta$ *fimB*::Kana against Hybrid $\Delta$ *fimB*:: (see Figures 6 and 8). We also checked the  
381 absence of fitness cost of the  $\Delta$ *aada2*::Kana variant by competing Hybrid $\Delta$ *aada2*::Kana  
382 against Hybrid in planktonic conditions in LB, as we were obliged to use only streptomycin  
383 susceptible strains in the intestinal colonization model (data not shown).

#### 384 **Competition assays**

##### 385 In planktonic conditions

386 No significant difference was observed between the relative fitness of Ancestor, Emergent  
387 and Hybrid in aerobic batch LB growth as CIs did not exceed 1 or -1 log (Figure 5A). The  
388 absence of the *fimB* gene did not impact the relative fitness of Ancestor and Hybrid (Figure  
389 5A).

##### 390 In mature biofilm conditions

391 No significant difference was observed between the relative fitness of Ancestor, Emergent  
392 and Hybrid in aerobic and anaerobic biofilm growth conditions as CIs did not exceed 1 or -1  
393 log (Figure 5B). However, a small competitive advantage was observed for both Ancestor and  
394 Hybrid against Emergent, after 7 days in anaerobic biofilm conditions. Lack of the *fimB* gene  
395 did not impact the relative fitness of Ancestor and Hybrid in these conditions (Figure 5B).



396 Intestinal colonization mouse model

397 Ancestor displayed a better intestinal colonization capacity than Emergent. Following the  
398 streptomycin treatment, none of the mice used in this experiment had Enterobacteriaceae in  
399 feces at the time of tested bacteria inoculation. Feces sampled at each studied time contained  
400 between  $10^5$  and  $10^{10}$  *E. coli* per gram showing a satisfactory colonization rate of mice (data  
401 not shown). Ancestor outcompeted significantly Emergent after seven days post-inoculation  
402 by at least 1.5 log CFU ( $P = 0.02$ ) (Figure 6), whereas there were no significant differences  
403 between Ancestor and Hybrid, and Emergent and Hybrid. Lack of the *fimB* gene did not seem  
404 to impact the colonization ability of Ancestor and Hybrid (Figure 6).

405 Septicemia mouse model

406 In terms of *in vivo* virulence expression, Ancestor, Emergent and Hybrid were “killers”, as  
407 they killed between 10 and 80% of the mice 24 h after inoculation (39). Kaplan-Meier  
408 survival curves showed significantly different killing patterns (Figure 7): Ancestor killed 70%  
409 of the mice in 24 h and 100% in 26 h whereas Emergent and Hybrid, which killed 0 and 20%  
410 of the mice in 24 h, respectively, required four days to kill 100% of the mice ( $P < 0.001$ ). No  
411 significant difference was observed between the positive control CFT073 killing pattern and  
412 the Ancestor’s one. The lack of the *fimB* gene in Ancestor and Hybrid did not impact their  
413 killing pattern (Figure 7). In order to observe subtler differences in the *in vivo* virulence,  
414 competitions in a 1:1 ratio were performed in this mouse model. Spleen bacterial analyses  
415 showed that Ancestor outcompeted by 1 and 2 log Hybrid and Emergent, respectively  
416 ( $P = 0.002$ ), and Hybrid outcompeted Emergent by 1 log ( $P = 0.002$ ) (Figure 8). Lack of the  
417 *fimB* gene in Ancestor and Hybrid did not impact their *in vivo* virulence in this mouse model  
418 (Figure 8).

419 Urinary tract infection mouse model

420 Ancestor displayed a better urinary tract colonization capacity than Emergent. In total, 30

421 mice were inoculated, with an overall infection rate of 87%, and no death was observed 48 h  
422 after the inoculation. Bladders and kidneys collected 48 h after inoculation contained an  
423 average of  $9.10^7$  CFU/g (range:  $4.10^4$ - $2.10^9$  CFU/g) and of  $5.10^5$  CFU/g (range:  $6.10^1$ - $2.10^6$   
424 CFU/g), respectively, showing a satisfactory colonization rate of mice (data not shown).  
425 Ancestor outcompeted Emergent by about 2 log in the bladder and the kidneys ( $P=0.004$ )  
426 (Figure 9). Hybrid outcompeted Emergent by about 2.5 log in the bladder ( $P=0.008$ ) but not in  
427 the kidneys (Figure 8). No significant difference was observed between Ancestor and Hybrid,  
428 even though Hybrid was predominant of about 2 log more in average in the kidneys (Figure  
429 9).

430

## 431 **Discussion**

432 The purpose of this work was to examine the phenotypic differences between clade B and  
433 clade C strains regarding growth rate, early biofilm formation, colonization ability and  
434 virulence, in order to estimate their potential role in the success of ST131 clade C strains. The  
435 originality and strength of our study was to analyze these phenotypic differences in various *in*  
436 *vitro* and *in vivo* models and under competition conditions. The limited number of strains  
437 submitted to *in vivo* competitions was determined by ethical concerns related to animal  
438 experimentations. Transposition of our *in vivo* results to human has to be made with caution  
439 because the animal models do not strictly reflect the infection physiological process observed  
440 in humans, particularly for the UTI model in which bacteria urethra ascent is absent.

441

442 Our ST131 collection comprised representative strains of subclade B and C, except for one,  
443 called Hybrid, which belonged to subclade B4 and harbored a *fimH30* allele. This exceptional  
444 feature has already been reported in another subclade B4 strain (5), indicating that *fim* operon

445 recombination that shaped the clade C evolution had also occurred among clade B strains, but  
446 apparently with a lower adaptive success in the genetic background of clade B than in that of  
447 clade C.

448 No growth rate difference was detected between our clade B and clade C strains and between  
449 fluoroquinolone susceptible and resistant strains. The latter finding is consistent with the fact  
450 that, among the mutations leading to fluoroquinolone-resistance, those observed in ST131  
451 displayed the lowest fitness cost (11). Moreover, no growth rate difference was observed  
452 between clinical and commensal strains of our collection. This might suggest that ST131 is  
453 adapted to both commensalism and extraintestinal virulence, supporting the idea that  
454 virulence could be a derivative of commensalism (29).

455 The genetic and phenotypic variability of ST131 subclades were rarely explored in details in  
456 previous literature. Our analyses of Kallonen *et al.*'s blood *E. coli* isolates showed that C1 and  
457 C2 subclade strains increased in frequency over time and that clade B strains, notably those of  
458 B4 and B5 subclades, persisted as well, representing 16.5% of the ST131 isolates.

459 One of the most interesting findings of our study was that clade C strains were less virulent  
460 and had lower intestinal and urinary colonization capacities than clade B strains. Regarding  
461 intestinal colonization, no comparison exists in the literature between these two clades, but  
462 contradictory results were obtained considering intestinal cell adhesion capacity (40). In terms  
463 of virulence, conflicting results were published, as, on the one hand, fluoroquinolone  
464 susceptible ST131 strains were shown to kill 50% of the mice when resistant ST131 strains  
465 killed 20% (41), and on the other hand, strains of virotype D, *i.e.* clade B-specific virotype,  
466 were shown to be less virulent than strains of other virotypes associated with clade C (39).  
467 Regarding urinary colonization, a clade C ST131 strain compared with strains belonging to  
468 well-known UPEC STs in separate mouse urinary tract infection (UTI) models, was shown to  
469 have a higher UTI ability (28). Here, we demonstrated that a representative subclade B1 strain

470 (Ancestor) outcompeted a representative clade C strain (Emergent) in a UTI model.  
471 Moreover, the “Hybrid” B4 subclade strain (harboring the *fimH30* allele) outcompeted the  
472 clade C strain in the bladder but not in the kidneys. Interestingly, Hybrid strain also displayed  
473 intermediate phenotypes with regard to intestine colonization and sepsis in mice, which could  
474 illustrate the gradual loss of virulence of ST131 over its phylogenetic evolution.  
475 As previously described, our clade B strains were more frequently early biofilm producers  
476 than clade C strains (23, 24, 42). Knocking out the *fimB* gene in clade B strains resulted in  
477 loss of both early biofilm production capacity and early type 1 fimbriae expression. It was  
478 shown that clade C ST131 mutants devoid of type 1 pili expression had a lower intestinal and  
479 urinary tract colonization abilities compared to parent strains (25, 40). We subjected  $\Delta$ *fimB*  
480 clade B mutants to competition experiments with parent strains. No differences were detected  
481 neither during growth in mature biofilm conditions nor during mouse intestinal colonization  
482 and septicemia model, suggesting that early biofilm production kinetic doesn’t seem to  
483 contribute to the better colonization abilities or to the higher virulence observed in clade B  
484 strains. In the same way, *E. coli* biofilm formation capacity on abiotic surfaces was not  
485 correlated to the ability to durably colonize mouse intestine (29). However, to confirm this  
486 hypothesis, competitions between Ancestor  $\Delta$ *fimB* mutant and Emergent would be required.  
487 It may appear surprising that the successful clade C had lower virulence and lower  
488 competitive ability in the intestine and in a UTI model. We propose two explanations. First,  
489 the resistance to fluoroquinolones displayed by clade C may come at a direct cost (43). This  
490 cost would not be revealed in maximum growth rate in planktonic conditions, but would  
491 manifest as a lower colonization ability. In spite of this cost, antibiotic resistance allowed  
492 clade C to spread. Second, the lower virulence may actually confer an additional evolutionary  
493 advantage to clade C. According to the trade-off theory (44), host exploitation by a pathogen  
494 evolves to an optimal level under a balance between the benefits in terms of transmission and

495 the costs in terms of host mortality (45). Thus, lower virulence could confer improved fitness  
496 overall by avoiding symptomatic infections (46, 47), even if it comes at the cost of lower  
497 colonisation ability.

498 To conclude, we revealed substantial phenotypic differences in different clades of ST131,  
499 with the successful and multi-resistant clade C being notably less able to form biofilm, and  
500 less able to colonize the intestine and the urinary tract than its ancestor clade B. Whether these  
501 phenotypic differences represent a cost in spite of which clade C is successful, or an  
502 additional adaptation, remains an open question that would be interesting to explore in further  
503 work.

504

## 505 **Acknowledgments**

506 We thank Christophe Beloin for his advices about biofilm exploration. We thank Meril  
507 Massot, Marie Vigan and Cedric Laouénan for their help with statistical analyses. We also  
508 thank Olivier Tenaillon and Antoine Bridier-Nahmias for genomic analyses assistance.  
509 Finally, we thank Johann Beghain, Mélanie Magnan and Françoise Chau for their technical  
510 assistance in this work.

511 This study was supported by a grant from the project JPI-EC-AMR 2016 with the French  
512 Agence Nationale de la Recherche (ANR) as sponsor (N°. ANR-16-JPEC-0002-04) to MHNC  
513 and by the “Fondation pour la Recherche Médicale” (Equipe FRM 2016, grant number  
514 DEQ20161136698) to ED. S.C.F.S. acknowledges the FPU programme for her grant  
515 (FPU15/02644) from the Secretaría General de Universidades, Spanish Ministerio de  
516 Educación, Cultura y Deporte.

517

## 518 **References**

- 519 1. Price LB, Johnson JR, Aziz M, Clabots C, Johnston B, Tchesnokova V, Nordstrom L,  
520 Billig M, Chattopadhyay S, Stegger M, Andersen PS, Pearson T, Riddell K, Rogers P,  
521 Scholes D, Kahl B, Keim P, Sokurenko EV. 2013. The epidemic of extended-spectrum-  
522  $\beta$ -bactamase-producing *Escherichia coli* ST131 is driven by a single highly pathogenic  
523 subclone, H30-Rx. *mBio* 4:e00377-13.
- 524 2. Johnson JR, Tchesnokova V, Johnston B, Clabots C, Roberts PL, Billig M, Riddell K,  
525 Rogers P, Qin X, Butler-Wu S, Price LB, Aziz M, Nicolas-Chanoine M-H, Debroy C,  
526 Robicsek A, Hansen G, Urban C, Platell J, Trott DJ, Zhanel G, Weissman SJ, Cookson  
527 BT, Fang FC, Limaye AP, Scholes D, Chattopadhyay S, Hooper DC, Sokurenko EV.  
528 2013. Abrupt emergence of a single dominant multidrug-resistant strain of *Escherichia*  
529 *coli*. *J Infect Dis* 207:919–928.
- 530 3. Olesen B, Frimodt-Møller J, Leihof RF, Struve C, Johnston B, Hansen DS, Scheutz F,  
531 Krogfelt KA, Kuskowski MA, Clabots C, Johnson JR. 2014. Temporal trends in  
532 antimicrobial resistance and virulence-associated traits within the *Escherichia coli*  
533 sequence type 131 clonal group and its H30 and H30-Rx subclones, 1968 to 2012.  
534 *Antimicrob Agents Chemother* 58:6886–6895.
- 535 4. Petty NK, Ben Zakour NL, Stanton-Cook M, Skippington E, Totsika M, Forde BM,  
536 Phan M-D, Gomes Moriel D, Peters KM, Davies M, Rogers BA, Dougan G, Rodriguez-  
537 Baño J, Pascual A, Pitout JDD, Upton M, Paterson DL, Walsh TR, Schembri MA,  
538 Beatson SA. 2014. Global dissemination of a multidrug resistant *Escherichia coli* clone.  
539 *Proc Natl Acad Sci U S A* 111:5694–5699.
- 540 5. Ben Zakour NL, Alsheikh-Hussain AS, Ashcroft MM, Khanh Nhu NT, Roberts LW,  
541 Stanton-Cook M, Schembri MA, Beatson SA. 2016. Sequential acquisition of virulence

- 542 and fluoroquinolone resistance has shaped the evolution of *Escherichia coli* ST131.  
543 mBio 7:e00347-00316.
- 544 6. Matsumura Y, Pitout JDD, Gomi R, Matsuda T, Noguchi T, Yamamoto M, Peirano G,  
545 DeVinney R, Bradford PA, Motyl MR, Tanaka M, Nagao M, Takakura S, Ichiyama S.  
546 2016. Global *Escherichia coli* sequence type 131 clade with *bla*<sub>CTX-M-27</sub> gene. Emerg  
547 Infect Dis 22:1900–1907.
- 548 7. Nicolas-Chanoine M-H, Bertrand X, Madec J-Y. 2014. *Escherichia coli* ST131, an  
549 intriguing clonal group. Clin Microbiol Rev 27:543–574.
- 550 8. Morales-Barroso I, López-Cerero L, Molina J, Bellido M, Navarro MD, Serrano L,  
551 González-Galán V, Praena J, Pascual A, Rodríguez-Baño J. 2017. Bacteraemia due to  
552 non-ESBL-producing *Escherichia coli* O25b:H4 sequence type 131: insights into risk  
553 factors, clinical features and outcomes. Int J Antimicrob Agents 49:498–502.
- 554 9. Kallonen T, Brodrick HJ, Harris SR, Corander J, Brown NM, Martin V, Peacock SJ,  
555 Parkhill J. 2017. Systematic longitudinal survey of invasive *Escherichia coli* in England  
556 demonstrates a stable population structure only transiently disturbed by the emergence of  
557 ST131. Genome Res 27:1437–1449.
- 558 10. Blanco J, Mora A, Mamani R, López C, Blanco M, Dahbi G, Herrera A, Blanco JE,  
559 Alonso MP, García-Garrote F, Chaves F, Orellana MÁ, Martínez-Martínez L, Calvo J,  
560 Prats G, Larrosa MN, González-López JJ, López-Cerero L, Rodríguez-Baño J, Pascual  
561 A. 2011. National survey of *Escherichia coli* causing extraintestinal infections reveals  
562 the spread of drug-resistant clonal groups O25b:H4-B2-ST131, O15:H1-D-ST393 and  
563 CGA-D-ST69 with high virulence gene content in Spain. J Antimicrob Chemother  
564 66:2011–2021.

- 565 11. Huseby DL, Pietsch F, Brandis G, Garoff L, Tegehall A, Hughes D. 2017. Mutation  
566 supply and relative fitness shape the genotypes of ciprofloxacin-resistant *Escherichia*  
567 *coli*. *Mol Biol Evol* 34:1029–1039.
- 568 12. Johnson TJ, Danzeisen JL, Youmans B, Case K, Llop K, Munoz-Aguayo J, Flores-  
569 Figueroa C, Aziz M, Stoesser N, Sokurenko E, Price LB, Johnson JR. 2016. Separate F-  
570 type plasmids have shaped the evolution of the H30 subclone of *Escherichia coli*  
571 sequence type 131. *mSphere* 1:e00121-16.
- 572 13. Jarlier V, Nicolas MH, Fournier G, Philippon A. 1988. Extended broad-spectrum beta-  
573 lactamases conferring transferable resistance to newer beta-lactam agents in  
574 Enterobacteriaceae: hospital prevalence and susceptibility patterns. *Rev Infect Dis*  
575 10:867–878.
- 576 14. Carattoli A, Zankari E, García-Fernández A, Voldby Larsen M, Lund O, Villa L, Møller  
577 Aarestrup F, Hasman H. 2014. *In silico* detection and typing of plasmids using  
578 PlasmidFinder and plasmid multilocus sequence typing. *Antimicrob Agents Chemother*  
579 58:3895–3903.
- 580 15. Seemann T. 2018. :mag\_right: :pill: Mass screening of contigs for antimicrobial and  
581 virulence genes: tseemann/abricate. Perl.
- 582 16. Zankari E, Hasman H, Cosentino S, Vestergaard M, Rasmussen S, Lund O, Aarestrup  
583 FM, Larsen MV. 2012. Identification of acquired antimicrobial resistance genes. *J*  
584 *Antimicrob Chemother* 67:2640–2644.
- 585 17. Joensen KG, Scheutz F, Lund O, Hasman H, Kaas RS, Nielsen EM, Aarestrup FM.  
586 2014. Real-time whole-genome sequencing for routine typing, surveillance, and  
587 outbreak detection of verotoxigenic *Escherichia coli*. *J Clin Microbiol* 52:1501–1510.



- 588 18. Chen L, Zheng D, Liu B, Yang J, Jin Q. 2016. VFDB 2016: hierarchical and refined  
589 dataset for big data analysis—10 years on. *Nucleic Acids Res* 44:D694–D697.
- 590 19. Dahbi G, Mora A, Mamani R, López C, Alonso MP, Marzoa J, Blanco M, Herrera A,  
591 Viso S, García-Garrote F, Tchesnokova V, Billig M, de la Cruz F, de Toro M, González-  
592 López JJ, Prats G, Chaves F, Martínez-Martínez L, López-Cerezo L, Denamur E, Blanco  
593 J. 2014. Molecular epidemiology and virulence of *Escherichia coli* O16:H5-ST131:  
594 comparison with *H30* and *H30-Rx* subclones of O25b:H4-ST131. *Int J Med Microbiol*  
595 304:1247–1257.
- 596 20. Vallenet D, Engelen S, Mornico D, Cruveiller S, Fleury L, Lajus A, Rouy Z, Roche D,  
597 Salvignol G, Scarpelli C, Médigue C. 2009. MicroScope: a platform for microbial  
598 genome annotation and comparative genomics. *Database J Biol Databases Curation*  
599 2009:bap021.
- 600 21. Niba ETE, Naka Y, Nagase M, Mori H, Kitakawa M. 2007. A genome-wide approach to  
601 identify the genes involved in biofilm formation in *Escherichia coli*. *DNA Res Int J*  
602 *Rapid Publ Rep Genes Genomes* 14:237–246.
- 603 22. Datsenko KA, Wanner BL. 2000. One-step inactivation of chromosomal genes in  
604 *Escherichia coli* K-12 using PCR products. *Proc Natl Acad Sci U S A* 97:6640–6645.
- 605 23. Flament-Simon S-C, Duprilot M, Mayer N, García V, Alonso MP, Blanco J, Nicolas-  
606 Chanoine M-H. 2019. Association between kinetics of early biofilm formation and  
607 clonal lineage in *Escherichia coli*. *Front Microbiol* 10:1183.
- 608 24. Nicolas-Chanoine M-H, Petitjean M, Mora A, Mayer N, Lavigne J-P, Boulet O, Leflon-  
609 Guibout V, Blanco J, Hocquet D. 2017. The ST131 *Escherichia coli* H22 subclone from

- 610 human intestinal microbiota: Comparison of genomic and phenotypic traits with those of  
611 the globally successful H30 subclone. *BMC Microbiol* 17:71.
- 612 25. Totsika M, Beatson SA, Sarkar S, Phan M-D, Petty NK, Bachmann N, Szubert M,  
613 Sidjabat HE, Paterson DL, Upton M, Schembri MA. 2011. Insights into a multidrug  
614 resistant *Escherichia coli* pathogen of the globally disseminated ST131 lineage: genome  
615 analysis and virulence mechanisms. *PLOS ONE* 6:e26578.
- 616 26. Dudin O, Geiselmann J, Ogasawara H, Ishihama A, Lacour S. 2014. Repression of  
617 flagellar genes in exponential phase by CsgD and CpxR, two crucial modulators of  
618 *Escherichia coli* biofilm formation. *J Bacteriol* 196:707–715.
- 619 27. Smati M, Clermont O, Bleibtreu A, Fourreau F, David A, Daubié A-S, Hignard C,  
620 Loison O, Picard B, Denamur E. 2015. Quantitative analysis of commensal *Escherichia*  
621 *coli* populations reveals host-specific enterotypes at the intra-species level.  
622 *MicrobiologyOpen* 4:604–615.
- 623 28. Vimont S, Boyd A, Bleibtreu A, Bens M, Goujon J-M, Garry L, Clermont O, Denamur  
624 E, Arlet G, Vandewalle A. 2012. The CTX-M-15-producing *Escherichia coli* clone  
625 O25b:H4-ST131 has high intestine colonization and urinary tract infection abilities. *PloS*  
626 *One* 7:e46547.
- 627 29. Diard M, Garry L, Selva M, Mosser T, Denamur E, Matic I. 2010. Pathogenicity-  
628 associated islands in extraintestinal pathogenic *Escherichia coli* are fitness elements  
629 involved in intestinal colonization. *J Bacteriol* 192:4885–4893.
- 630 30. Saint-Ruf C, Garfa-Traoré M, Collin V, Cordier C, Franceschi C, Matic I. 2014. Massive  
631 diversification in aging colonies of *Escherichia coli*. *J Bacteriol* 196:3059–3073.

- 632 31. Smati M, Magistro G, Adiba S, Wieser A, Picard B, Schubert S, Denamur E. 2017.  
633 Strain-specific impact of the high-pathogenicity island on virulence in extra-intestinal  
634 pathogenic *Escherichia coli*. *Int J Med Microbiol IJMM* 307:44–56.
- 635 32. Johnson JR, Clermont O, Menard M, Kuskowski MA, Picard B, Denamur E. 2006.  
636 Experimental mouse lethality of *Escherichia coli* isolates, in relation to accessory traits,  
637 phylogenetic group, and ecological source. *J Infect Dis* 194:1141–1150.
- 638 33. Labat F, Pradillon O, Garry L, Peuchmaur M, Fantin B, Denamur E. 2005. Mutator  
639 phenotype confers advantage in *Escherichia coli* chronic urinary tract infection  
640 pathogenesis. *FEMS Immunol Med Microbiol* 44:317–321.
- 641 34. Holm S. 1979. A simple sequentially rejective multiple test procedure. *Scand J Stat*  
642 6:65–70.
- 643 35. R development core team. 2014. R: A language and environment for statistical  
644 computing. R Foundation for Statistical Computing, Vienna, Austria. ISBN 3-900051-  
645 07-0, URL: <http://www.R-project.org>.
- 646 36. Fronzes R, Remaut H, Waksman G. 2008. Architectures and biogenesis of non-flagellar  
647 protein appendages in Gram-negative bacteria. *EMBO J* 27:2271–2280.
- 648 37. Ohnishi K, Ohto Y, Aizawa S, Macnab RM, Iino T. 1994. FlgD is a scaffolding protein  
649 needed for flagellar hook assembly in *Salmonella typhimurium*. *J Bacteriol* 176:2272–  
650 2281.
- 651 38. Condemine G, Berrier C, Plumbridge J, Ghazi A. 2005. Function and expression of an  
652 N-acetylneuraminic acid-inducible outer membrane channel in *Escherichia coli*. *J*  
653 *Bacteriol* 187:1959–1965.

- 654 39. Mora A, Dahbi G, López C, Mamani R, Marzoa J, Dion S, Picard B, Blanco M, Alonso  
655 MP, Denamur E, Blanco J. 2014. Virulence patterns in a murine sepsis model of ST131  
656 *Escherichia coli* clinical isolates belonging to serotypes O25b:H4 and O16:H5 are  
657 associated to specific virotypes. PLoS ONE 9:e87025.
- 658 40. Sarkar S, Hutton ML, Vagenas D, Ruter R, Schüller S, Lyras D, Schembri MA, Totsika  
659 M. 2018. Intestinal colonization traits of pandemic multidrug-resistant *Escherichia coli*  
660 ST131. J Infect Dis 218:979–990.
- 661 41. Johnson JR, Porter SB, Zhanel G, Kuskowski MA, Denamur E. 2012. Virulence of  
662 *Escherichia coli* clinical isolates in a murine sepsis model in relation to sequence type  
663 ST131 status, fluoroquinolone resistance, and virulence genotype. Infect Immun  
664 80:1554–1562.
- 665 42. Pantel A, Dunyach-Remy C, Essebe CN, Mesureur J, Sotto A, Pagès J-M, Nicolas-  
666 Chanoine M-H, Lavigne J-P. 2016. Modulation of membrane influx and efflux in  
667 *Escherichia coli* sequence type 131 has an impact on bacterial motility, biofilm  
668 formation, and virulence in a *Caenorhabditis elegans* model. Antimicrob Agents  
669 Chemother 60:2901–2911.
- 670 43. Basra P, Alsaadi A, Bernal-Astrain G, O’Sullivan ML, Hazlett B, Clarke LM,  
671 Schoenrock A, Pitre S, Wong A. 2018. Fitness tradeoffs of antibiotic resistance in  
672 extraintestinal pathogenic *Escherichia coli*. Genome Biol Evol 10:667–679.
- 673 44. Anderson RM, May RM. 1982. Coevolution of hosts and parasites. Parasitology 85 (Pt  
674 2):411–426.
- 675 45. Diard M, Hardt W-D. 2017. Evolution of bacterial virulence. FEMS Microbiol Rev  
676 41:679–697.

- 677 46. Liu CM, Stegger M, Aziz M, Johnson TJ, Waits K, Nordstrom L, Gauld L, Weaver B,  
678 Rolland D, Statham S, Horwinski J, Sariya S, Davis GS, Sokurenko E, Keim P, Johnson  
679 JR, Price LB. 2018. *Escherichia coli* ST131-H22 as a foodborne uropathogen. mBio  
680 9:e00470–18, /mbio/9/4/mBio.00470–18.atom.
- 681 47. Salvador E, Wagenlehner F, Köhler C-D, Mellmann A, Hacker J, Svanborg C, Dobrindt  
682 U. 2012. Comparison of asymptomatic bacteriuria *Escherichia coli* isolates from healthy  
683 individuals *versus* those from hospital patients shows that long-term bladder  
684 colonization selects for attenuated virulence phenotypes. Infect Immun 80:668–678.

685

## 686 **Figure legend**

687 **Figure 1. Dynamics of subclades of O25b:H4 ST131 *E. coli* isolated from bacteremia over**  
688 **a 11-year sampling period [data from Kallonen *et al* (9)].** A. Cumulated frequencies of  
689 ST131 subclades as a function of time, from the most ancestral subclade B1 at the bottom to  
690 the derived subclade C2 on top. B. Frequency of ST131 subclades as a function of time.  
691 Subclades are represented by colors. C. Inferred linear trends of ST131 subclade frequencies  
692 (among all *E. coli* strains) as a function of time over 2001-2012.

693 **Figure 2. Early biofilm production.** Biofilm Ring Test<sup>®</sup> was used to measure biofilm  
694 formation after 2, 3 and 5h of static incubation. BFI values are inversely proportional to the  
695 biofilm formation capacity. A. Biofilm formation for the 39 *E. coli* ST131 strains. Clade B:  
696 continuous line; clade C: dashed line. Biofilm groups: blue lines: never producers; green  
697 lines: delayed producers; orange lines: early producers. B and C. Biofilm measurements for  
698 the *fimB* gene knockout experiments on Ancestor and Hybrid strains, respectively.  $\Delta fimB$ :  
699  $\Delta fimB::$ ;  $\Delta fimBp$ :  $\Delta fimB::pSC-A$ , strain complemented with an empty plasmid;  $\Delta fimBc$ :  
700  $\Delta fimB::pSC-A-fimB$ , strain complemented with its *fimB* gene.

701 **Figure 3. Maximum growth rate of the 39 *E. coli* strains in LB.** Maximum growth rate is  
702 calculated from three independent culture assays and expressed in  $\text{h}^{-1}$ . Boxplots indicate  
703 maximum growth rate distribution across strains, and horizontal black bars indicate median  
704 values. The upper and lower ends of the box correspond to the upper and lower quartiles,  
705 respectively. Error bars represent the standard error of the mean of three experiments. Outliers  
706 are represented by dots. Strains were grouped into two categories: A. Clade B and clade C  
707 strains; B. Clinical and commensal (feces) strains; C. Nalidixic acid-resistant (R) and  
708 susceptible (S) strains within clade B; D. Nalidixic acid-resistant (R) and susceptible (S)  
709 strains within clade C. No significant difference was observed in each comparison (Wilcoxon  
710 test)

711 **Figure 4. Virulence factors (VF)-encoding genes in Ancestor, Emergent and Hybrid.**  
712 Each strain is represented by a circle, VF encoding genes specific of a strain are indicated in  
713 the unshared part of the circle, while genes in common are indicated in the intersecting region  
714 between the two or three involved strains. Among the 67 genes found at least once in these  
715 three strains, the 42 common genes are as follows: *fdeC*, *fimACDEFGHI*, *yfcV*, *yagVWXYZ*  
716 *,ykgK*, *chuA*, *fyuA*, *entABCEFS*, *fepABCDG*, *fes*, *irp2*, *kpsDEMMTII*, *K5*, *iss*, *malX*, *usp*,  
717 *ompT*, *ompA*, *aslA*.

718 **Figure 5. *In vitro* competitions.** Dots shapes indicate the couple of strains in competition in  
719 panels A and B. Competitive index (CI) is expressed in log, and CI above zero (blue line)  
720 means that isolate 1 outcompetes isolate 2, and conversely. An interval of  $\pm 1$  log was  
721 considered as the limit of discrimination. Error bars represent the standard error of the mean  
722 of a least three experiments. A. Competitions at an initial ratio of 1:1 in planktonic conditions  
723 in LB medium during 100 generations. B. Competitions at an initial ratio of 1:1 in mature  
724 biofilm conditions (bacteria spotted on BHI agar plate) during 7 days, in aerobic (continuous  
725 line) and anaerobic atmosphere (dashed line).

726 **Figure 6. Competition in an intestinal colonization mouse model.** Competitive index (CI)  
727 is expressed in log, and CI above zero means that isolate 1 outcompetes isolate 2, and  
728 conversely. An interval of  $\pm 1$  log was considered as the limit of discrimination. Each dot  
729 represents a mouse at given times: light blue: day 1, dark blue: day 4 and green: day 7 post-  
730 inoculation. Black diamonds depict mean values of CI. Kanamycin resistance cassette: control  
731 competition evaluating the cost of the Kanamycin resistance cassette, with Ancestor $\Delta fimB::$  or  
732 Hybrid $\Delta fimB::$  as isolate 1, and Ancestor $\Delta fimB::$ Kana or Hybrid $\Delta fimB::$ Kana as isolate 2,  
733 respectively. \* P=0.02, generated by the Wilcoxon signed-rank test and corrected for multiple  
734 comparisons by the Benjamini-Hochberg procedure.

735 **Figure 7. Kaplan-Meier survival curves of mice injected with *E. coli* ST131 strains.**  
736 Strains are represented by line types.

737 **Figure 8. Competition in septicemia mouse model determined by spleen bacterial load.**  
738 Competitive index (CI) is expressed in log, and CI above zero means that isolate 1  
739 outcompetes isolate 2, and conversely. An interval of  $\pm 1$  log was considered as the limit of  
740 discrimination. Kanamycin resistance cassette: control competition evaluating the cost of the  
741 Kanamycin resistance cassette, with Ancestor $\Delta fimB::$  or Hybrid $\Delta fimB::$  as isolate 1, and  
742 Ancestor $\Delta fimB::$ Kana or Hybrid $\Delta fimB::$ Kana as isolate 2 respectively. \*\* P=0.002, generated  
743 by the Wilcoxon signed-rank test.

744 **Figure 9. Competition in urinary tract infection mouse model determined by bladder  
745 and kidney bacterial load.** Competitive index (CI) is expressed in log, and CI above zero  
746 means that isolate 1 outcompetes isolate 2, and conversely. An interval of  $\pm 1$  log was  
747 considered as the limit of discrimination. \*\* P<0.01, generated by the Wilcoxon signed-rank  
748 test and corrected for multiple comparisons by the Benjamini-Hochberg procedure.

749

750

751 **Table 1. Yeast agglutination test applied to the 39 strains in different growth conditions**  
 752 **and at different time points according to biofilm production phenotype and clade type.**

| Number (%) of strains positive for the yeast agglutination test |                 |         |                            |                   |          |          |
|-----------------------------------------------------------------|-----------------|---------|----------------------------|-------------------|----------|----------|
| Group                                                           | Early test      |         | Standard <sup>a</sup> test |                   |          |          |
|                                                                 | Shaking culture |         | Shaking culture            | Static subculture |          |          |
|                                                                 | 2h              | 5h      |                            | 24h               | 48h      | 72h      |
| Biofilm ++ (n=8)                                                | 8 (100)         | 8 (100) | 8 (100)                    | 8 (100)           | 8 (100)  | 8 (100)  |
| Biofilm -+ (n=16)                                               | 4 (25)          | 6 (38)  | 14 (89)                    | 14 (89)           | 14 (89)  | 14 (89)  |
| Biofilm -- (n=15)                                               | 1 (7)           | 1 (7)   | 13 (87)                    | 14 (93)           | 15 (100) | 15 (100) |
| Clade B (n=19)                                                  | 13 (68)         | 15 (79) | 17 (90)                    | 17 (90)           | 17 (90)  | 17 (90)  |
| Clade C (n=20)                                                  | 0               | 0       | 18 (90)                    | 19 (95)           | 20 (100) | 20 (100) |

<sup>a</sup>. Standard test was realized according to Totsika *et al.*<sup>25</sup>; ++: early biofilm producer; -+: delayed biofilm producer; --: never biofilm producer; \* Fisher exact test  $P \leq 0.0001$ .

753

754

755

756

757

758

759

760

761

762

763

764

765



766 **Table 2. Colony color and morphotype on Congo red agar plates of the**  
 767 **39 strains according to biofilm production phenotype and clade type**

| Number (%) of strains with a positive Congor red test |                    |                 |
|-------------------------------------------------------|--------------------|-----------------|
| Group                                                 | Congo red staining | Rdar morphotype |
| Biofilm ++ (n=8)                                      | 8 (100)            | 8 (100)         |
| Biofilm -+ (n=16)                                     | 1 (6)              | 1 (6)           |
| Biofilm -- (n=15)                                     | 4 (27)             | 3 (20)          |
| Clade B (n=19)                                        | 9 (47)             | 9 (47)          |
| Clade C (n=20)                                        | 3 (15)             | 2 (10)          |

++: early biofilm producer; -+: delayed biofilm producer; --: never biofilm producer; Rdar : red, dry and rough colonies; \* Fisher exact test P<0.0001;

\*\* Fisher exact test P<0.001

768

769

770

771

772

773

774

775

776

777

778

779

780

781

782

783

784

785 **Table 3. Comparative characteristics of the three strains selected for competition assays**

| Selected strain           | MGR (h <sup>-1</sup> ) | Colicin/phage production | Biofilm formation phenotype | Type 1 fimbriae expression | Congo red assay phenotype | Antibiotic resistance encoding gene                                                                                                         | Nb of VF encoding genes | Nb of ExPEC VF encoding genes |
|---------------------------|------------------------|--------------------------|-----------------------------|----------------------------|---------------------------|---------------------------------------------------------------------------------------------------------------------------------------------|-------------------------|-------------------------------|
| <b>Ancestor (S250)</b>    | 1.35±0,06              | no                       | early                       | in 2h                      | rdar                      | /                                                                                                                                           | 53                      | 14                            |
| <b>Emergent (CES164C)</b> | 1.48±0,06              | no                       | never                       | in 24h                     | red staining              | <i>bla</i> <sub>TEM</sub> ,<br><i>gyrA</i> <i>IAB</i> ,<br><i>parC</i> <i>IaAB</i>                                                          | 52                      | 14                            |
| <b>Hybrid (CES131C)</b>   | 1.47±0,09              | no                       | delayed                     | in 2h                      | white staining            | <i>bla</i> <sub>TEM</sub> ,<br><i>aac(3)-IIId</i> ,<br><i>aadA2</i> , <i>mphA</i> ,<br><i>sul1</i> , <i>tetA</i> ,<br><i>dfrA</i> <i>I2</i> | 63                      | 16                            |

786 rdar: red, dry and rough; VF: virulence factor

787

788

789

790

791

792

793

794

795

796

797

798

799

800

801

802 **Figures**

803

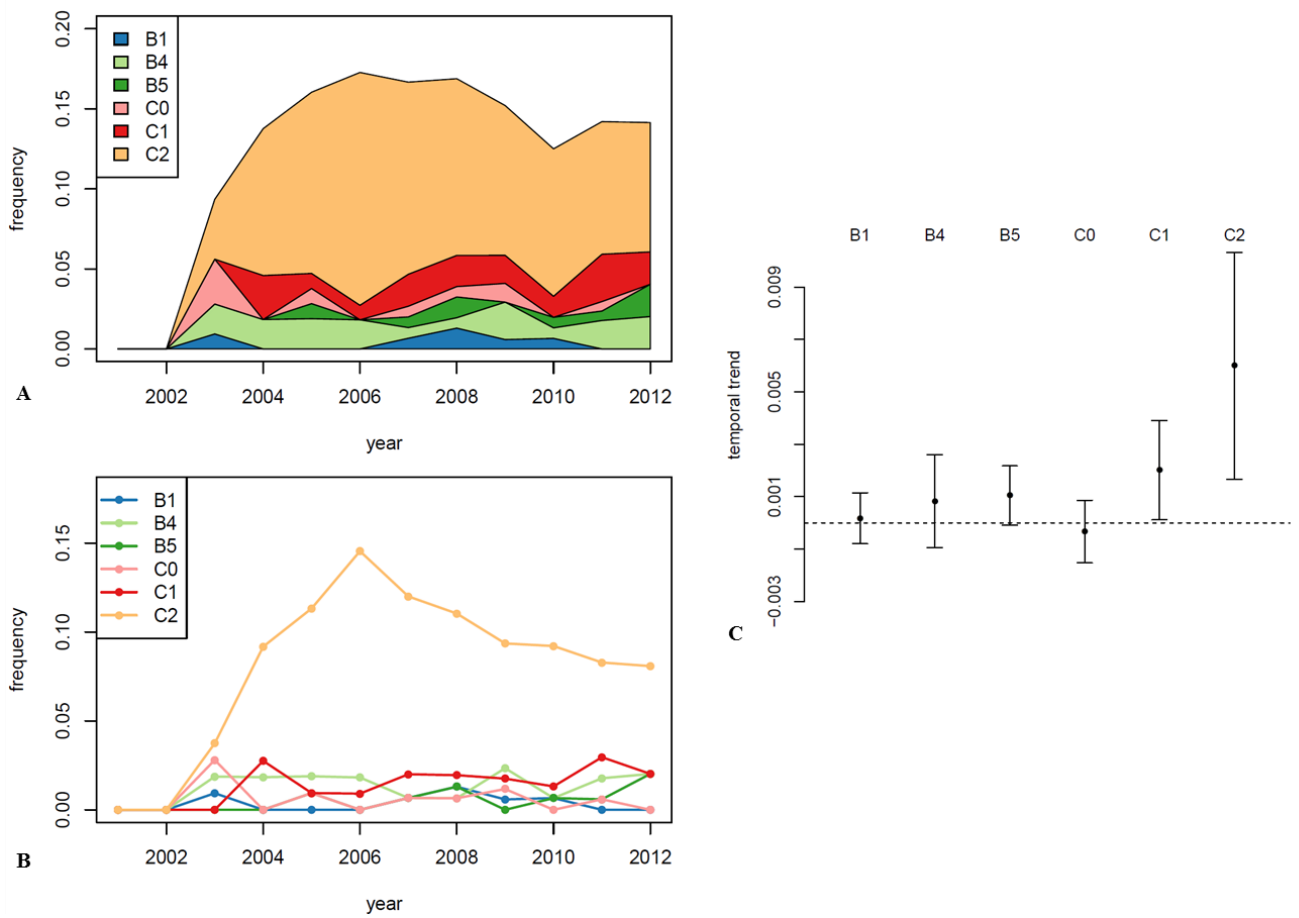

804

805 **Figure 2. Dynamics of subclades of O25b:H4 ST131 *E. coli* isolated from bacteremia over**

806 **a 11-year sampling period [data from Kallonen *et al* (9)]. A. Cumulated frequencies of**

807 **ST131 subclades as a function of time, from the most ancestral subclade B1 at the bottom to**

808 **the derived subclade C2 on top. B. Frequency of ST131 subclades as a function of time.**

809 **Subclades are represented by colors. C. Inferred linear trends of ST131 subclade frequencies**

810 **(among all *E. coli* strains) as a function of time over 2001-2012.**

811

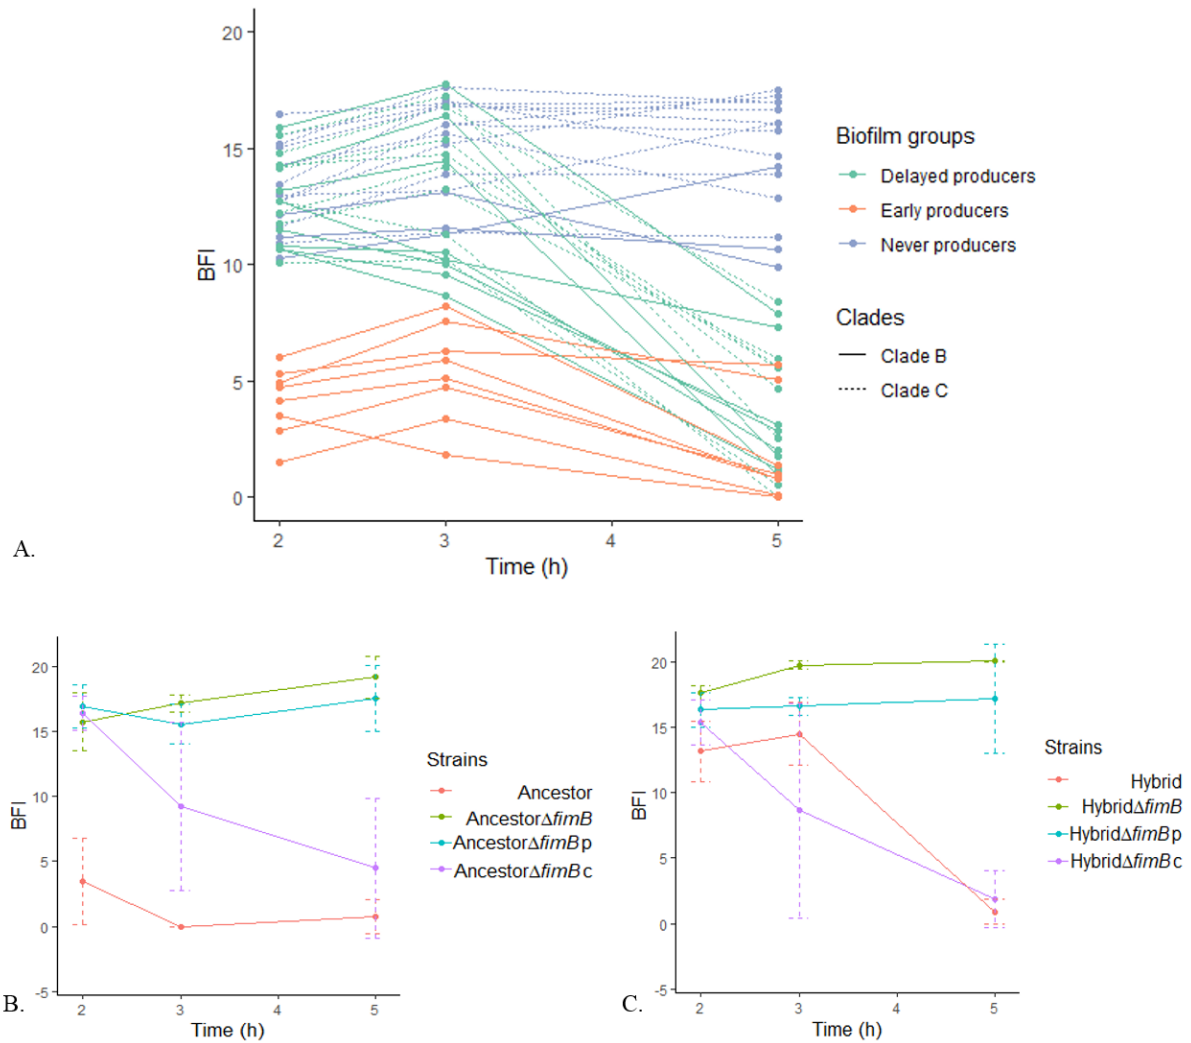

812

813 **Figure 2. Early biofilm production.** Biofilm Ring Test<sup>®</sup> was used to measure biofilm

814 formation after 2, 3 and 5 h of static incubation. BFI values are inversely proportional to the

815 biofilm formation capacity. A. Biofilm formation for the 39 *E. coli* ST131 strains. Clade B:

816 continuous line; clade C: dashed line. Biofilm groups: blue lines: never producers; green lines:

817 delayed producers; orange lines: early producers. B and C. Biofilm measurements for the *fimB*

818 gene knockout experiments on Ancestor and Hybrid strains, respectively.  $\Delta$ *fimB*:  $\Delta$ *fimB*::;

819  $\Delta$ *fimB*p:  $\Delta$ *fimB*::pSC-A, strain complemented with an empty plasmid;  $\Delta$ *fimB*c:  $\Delta$ *fimB*::pSC-A-

820 *fimB*, strain complemented with its wild type *fimB* gene.

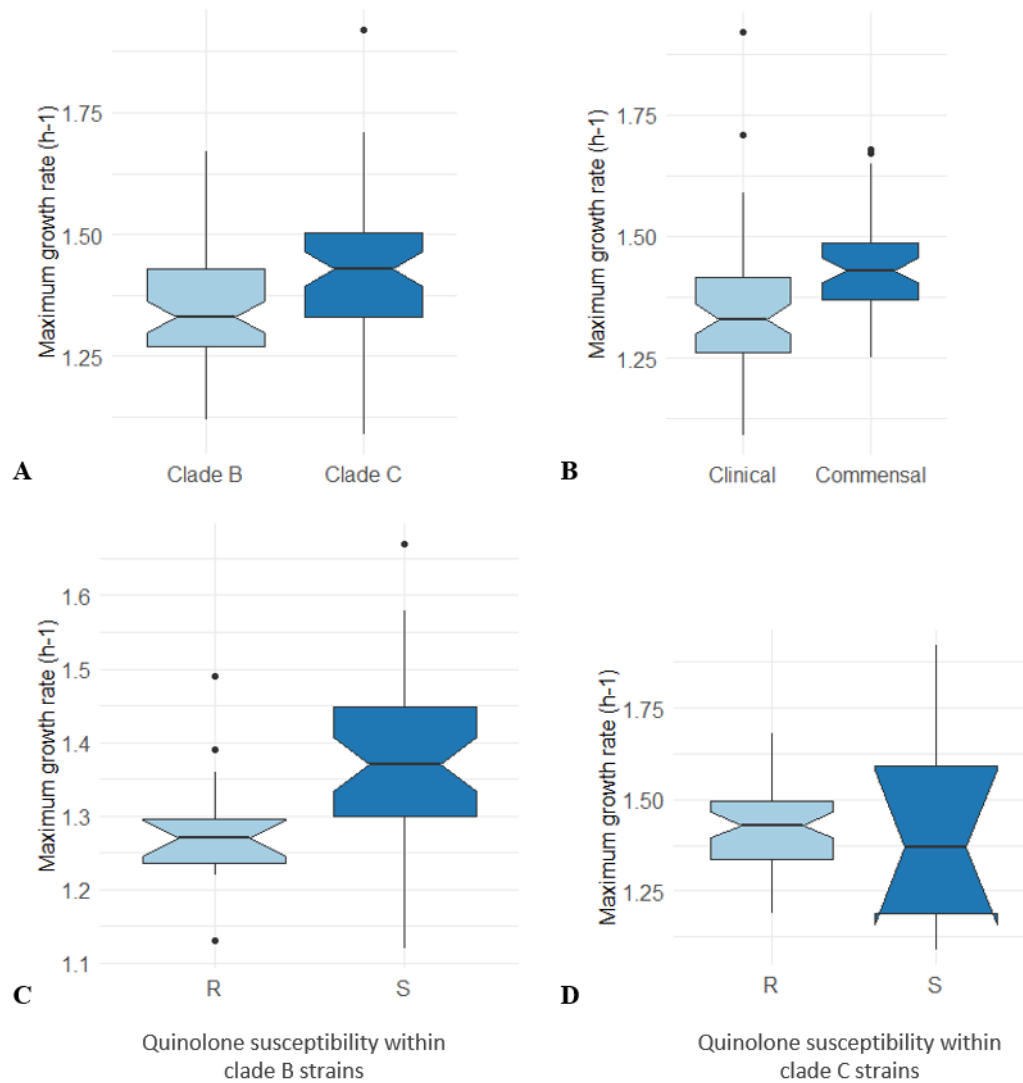

821

822 **Figure 3. Maximum growth rate of the 39 *E. coli* strains in LB.** Maximum growth rate is  
823 calculated from three independent culture assays and expressed in h<sup>-1</sup>. Boxplots indicate  
824 maximum growth rate distribution across strains, and horizontal black bars indicate median  
825 values. The upper and lower ends of the box correspond to the upper and lower quartiles,  
826 respectively. Error bars represent the standard error of the mean of three experiments. Outliers  
827 are represented by dots. Strains were grouped into two categories: A. Clade B and clade C  
828 strains; B. Clinical and commensal (feces) strains; C. Nalidixic acid-resistant (R) and  
829 susceptible (S) strains within clade B; D. Nalidixic acid-resistant (R) and susceptible (S) strains  
830 within clade C. No significant difference was observed in each comparison (Wilcoxon test)

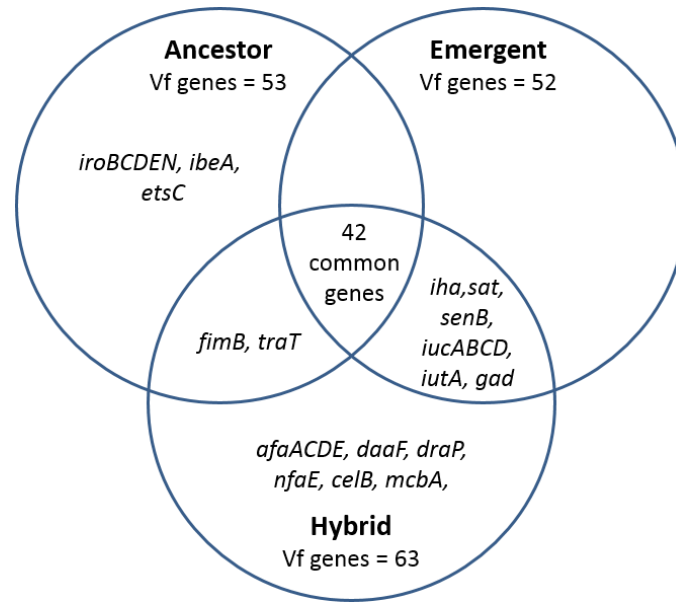

831

832 **Figure 4. Virulence factors (VF)-encoding genes in Ancestor, Emergent and Hybrid.** Each  
833 strain is represented by a circle, VF encoding genes specific of a strain are indicated in the  
834 unshared part of the circle, while genes in common are indicated in the intersecting region  
835 between the two or three involved strains. Among the 67 genes found at least once in these  
836 three strains, the 42 common genes are as follows: *fdeC, fimACDEFGHI, yfcV, yagVWXYZ*  
837 *,ykgK, chuA, fyuA, entABCEFS, fepABCDG, fes, irp2, kpsDEMMTII, K5, iss, malX, usp, ompT,*  
838 *ompA, aslA.*

839

840

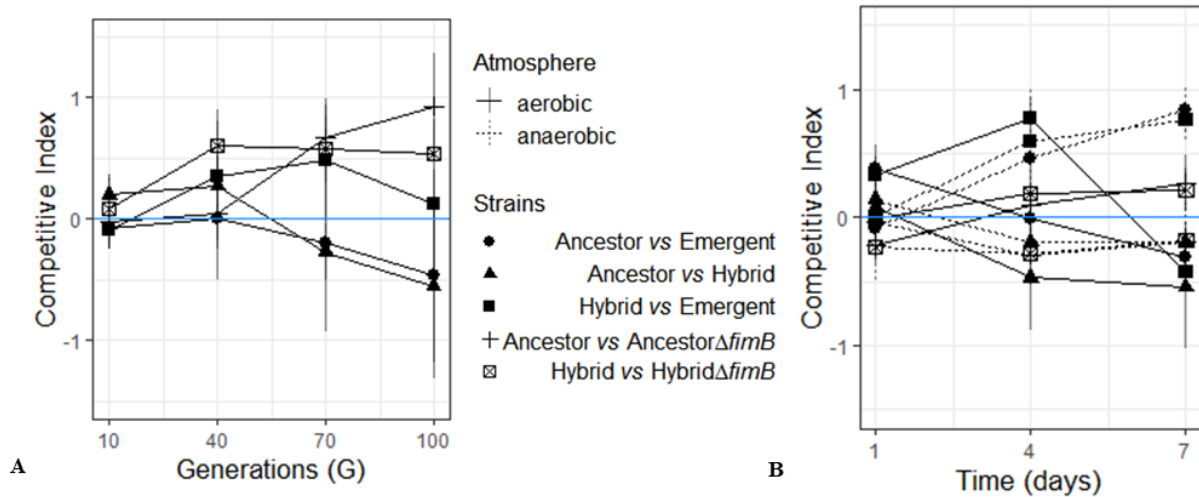

841

842 **Figure 5. *In vitro* competitions.** Dots shapes indicate the couple of strains in competition in  
843 panels A and B. Competitive index (CI) is expressed in log, and CI above zero (blue line) means  
844 that isolate 1 outcompetes isolate 2, and conversely. An interval of  $\pm 1$  log was considered as  
845 the limit of discrimination. Error bars represent the standard error of the mean of a least three  
846 experiments. A. Competitions at an initial ratio of 1:1 in planktonic conditions in LB medium  
847 during 100 generations. B. Competitions at an initial ratio of 1:1 in biofilm conditions (bacteria  
848 spotted on BHI agar plate) during 7 days, in aerobic (continuous line) and anaerobic atmosphere  
849 (dashed line).

850

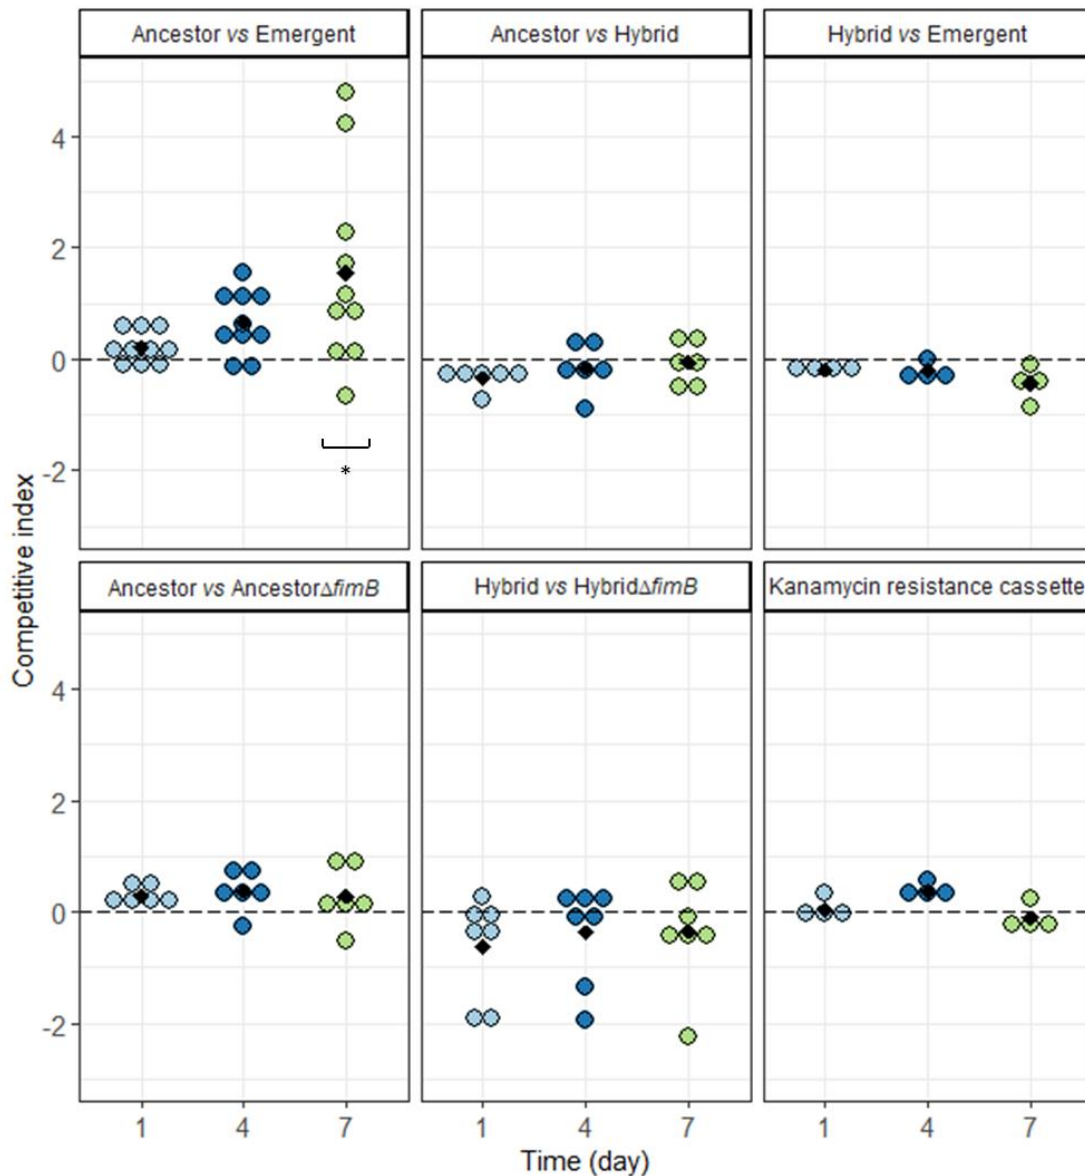

851

852 **Figure 6. Competition in an intestinal colonization mouse model.** Competitive index (CI) is  
853 expressed in log, and CI above zero means that isolate 1 outcompetes isolate 2, and conversely.  
854 An interval of  $\pm 1$  log was considered as the limit of discrimination. Each dot represents a mouse  
855 at given times: light blue: day 1, dark blue: day 4 and green: day 7 post-inoculation. Black  
856 diamonds depict mean values of CI. Kanamycin resistance cassette: control competition  
857 evaluating the cost of the Kanamycin resistance cassette, with *Ancestor $\Delta$ *fimB*::* or  
858 *Hybrid $\Delta$ *fimB*::* as isolate 1, and *Ancestor $\Delta$ *fimB*::Kana* or *Hybrid $\Delta$ *fimB*::Kana* as isolate 2,  
859 respectively. \*  $P=0.02$ , generated by the Wilcoxon signed-rank test and corrected for multiple  
860 comparisons by the Benjamini-Hochberg procedure.

861



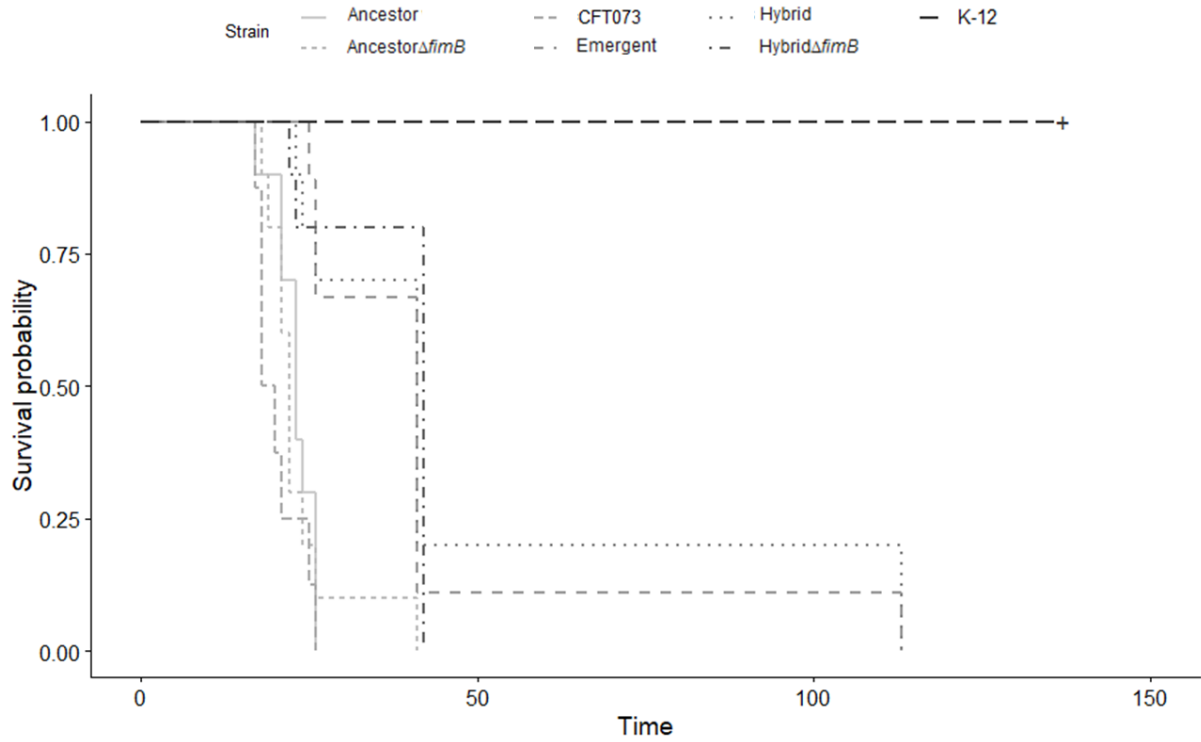

862

863 **Figure 7. Kaplan-Meier survival curves of mice injected with *E. coli* ST131 strains.** Strains

864 are represented by line types.

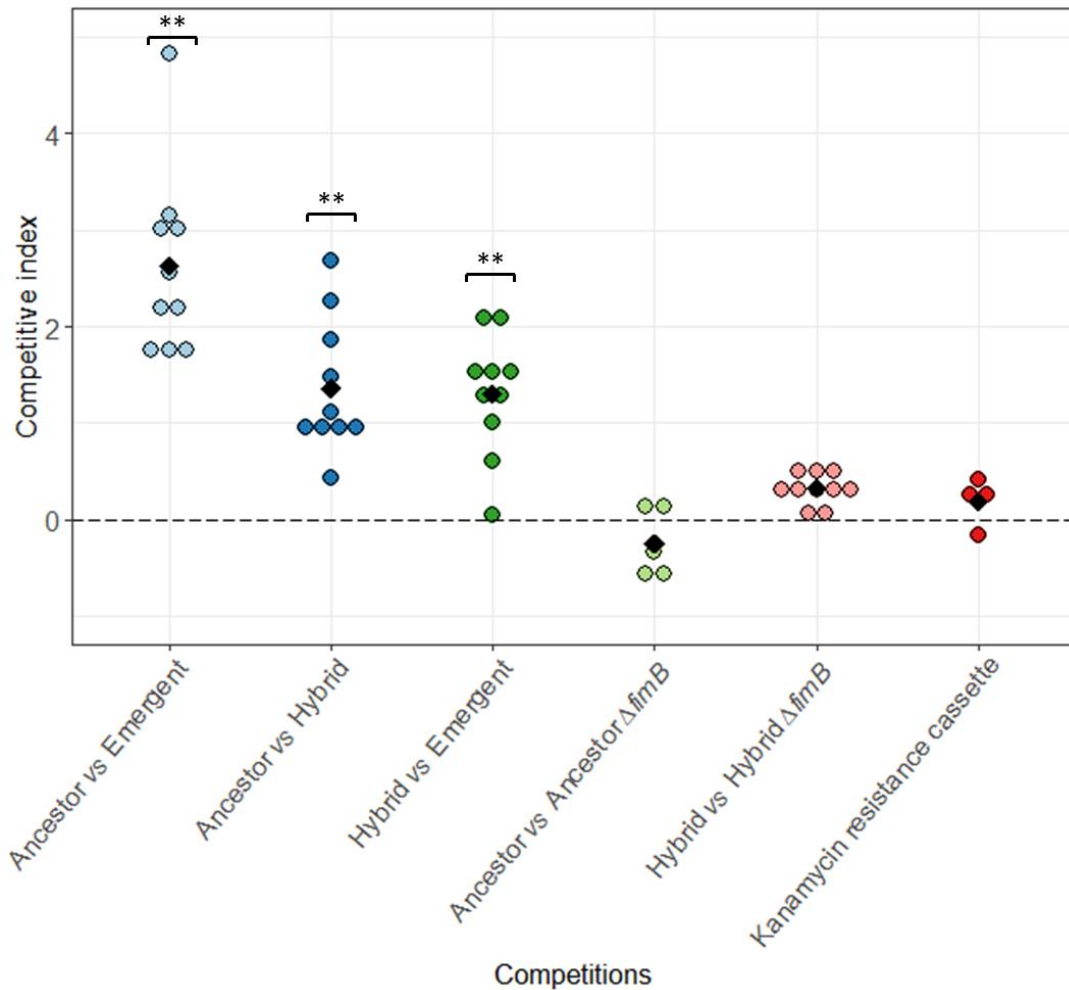

865

866 **Figure 8. Competition in septicemia mouse model determined by spleen bacterial load.**

867 Competitive index (CI) is expressed in log, and CI above zero means that isolate 1 outcompetes  
868 isolate 2, and conversely. An interval of  $\pm 1$  log was considered as the limit of discrimination.

869 Kanamycin resistance cassette: control competition evaluating the cost of the Kanamycin

870 resistance cassette, with Ancestor $\Delta fimB::$  or Hybrid $\Delta fimB::$  as isolate 1, and

871 Ancestor $\Delta fimB::$ Kana or Hybrid $\Delta fimB::$ Kana as isolate 2 respectively. \*\* P=0.002, generated

872 by the Wilcoxon signed-rank test.

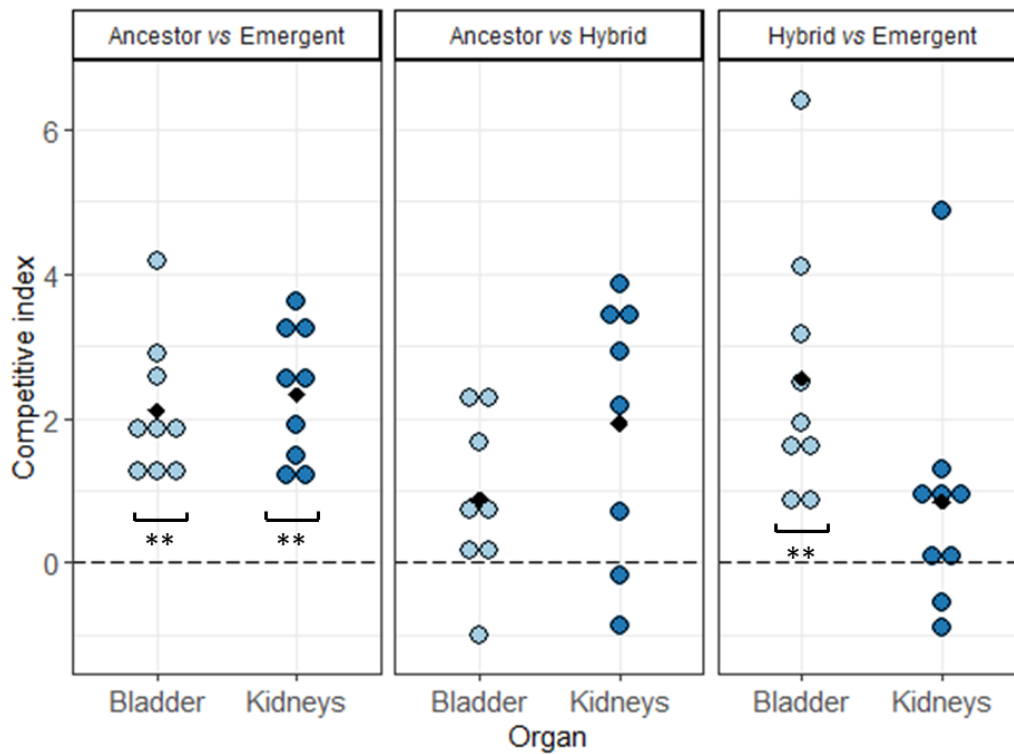

873

874 **Figure 9. Competition in urinary tract infection mouse model determined by bladder and**  
875 **kidneys bacterial load.** Competitive index (CI) is expressed in log, and CI above zero means  
876 that isolate 1 outcompetes isolate 2, and conversely. An interval of  $\pm 1$  log was considered as  
877 the limit of discrimination. \*\*  $P < 0.01$ , generated by the Wilcoxon signed-rank test and  
878 corrected for multiple comparisons by the Benjamini-Hochberg procedure.

879

880

881

882 **Supplemental material legend**

883 **Text S1. Technical details of the Materials and Methods section**

884 **Table S1. Strain collection: characteristics known at collection time**

885 **Table S2. Genome sequence quality**

886 **Table S3. Primers used in this study**

887 **Table S4. Plasmids used in this study**

888 **Table S5. Genotypic and phenotypic analyses of strain collection**

889 **Table S6. Main virulence factor (VF)-encoding genes**

890

891 **Figure S1. Multiple correspondence analyses (MCA) of the 39 *E. coli* ST131 strains.** (A)

892 The variables are as follows: the sources (fecal or clinical sample), the *fimH* allele (*H22* or

893 *H30*), fluoroquinolone (FQ) susceptibility (FQ\_S: susceptible to FQ or FQ\_R: resistant to

894 FQ), the ESBL production (ESBL\_P: ESBL producer or ESBL\_N: non-ESBL producer), the

895 biofilm production (early, delayed or never). cos2: square cosine (B) Plane projections on the

896 Dim1-Dim2 of the variables and the strains. Strains or groups of strains are represented by

897 colored circles: clade B in red and clade C in blue; circle size varies with the number of strain

898 represented; variables are represented by black triangles. Locations of the three chosen

899 strains, Ancestor, Hybrid and Emergent are pointed.

900 **Figure S2. Maximum likelihood phylogenetic tree.** This tree was built from non-

901 recombinant SNPs using maximum likelihood, rooted on a clade A ST131 reference strain,

902 SE15. Scale bar represents the average nucleotide substitutions per site. Branches are colored

903 in accordance with subclades: B1 in yellow, B2 in pale orange, B3 in dark orange, B4 in red,

904 B5 in pink, B0 in purple, C0 in pale blue, C1 in light green, C1-M27 in dark blue and C2 in

905 dark green. Strains are named according to their origin : BZ for Ben Zakour *et al.*(5), K for

906 Kallonen *et al.*(9) and D for this work.

907 **Figure S3. Schematic representation of the *fim* operon in a clade B strain, a clade C**  
908 **strains and Hybrid strain of subclade B4.** Genes are depicted by arrows except for *fimS* that  
909 is an invertible element, and the dotted lines represent ISEc55: the insertion sequence present  
910 within the *fimB* gene of all clade C strains. A. Comparison between a representative clade B  
911 strain and Hybrid . B. Comparison between Hybrid and a representative clade C strain. SNP:  
912 single nucleotide polymorphisms and their effect: non-synonymous and synonymous. The  
913 additional number indicates the presence of gap.
